# Supplementary material for: Cryptic prophages within a Streptococcus pyogenes genotype emm4 lineage
Source: PubMed Central journal article supplement (PMC8115907; doi:10.1099/mgen.0.000482), 2020-11-27
Supplement: mgen-7-482-s001.pdf [file mgen-7-482-s001.pdf]

## Supplementary Information for:

### Cryptic prophages within a *Streptococcus pyogenes* genotype *emm4* lineage

Alex Remington, Samuel Haywood, Julia Edgar, Luke R. Green, Thushan de Silva, Claire E. Turner.

#### Supplementary Tables

**Supplementary Table 1.** Completed genomes.

| Isolate     | Accession No. | Total length | Prophages                                                                                                    |
|-------------|---------------|--------------|--------------------------------------------------------------------------------------------------------------|
| BSAC_bs192  | CP061134      | 1,865,571 bp | Φ427.1 ( <i>speC/spd1</i> )<br>Φ427.2 ( <i>spd3</i> )<br>Φ427.3 ( <i>ssa</i> )<br>Φ192.1 ( <i>speK/sla</i> ) |
| BSAC_bs472  | CP061133      | 1,859,391 bp | Φ427.1 ( <i>speC/spd1</i> )<br>Φ427.2 ( <i>spd3</i> )<br>Φ427.3 ( <i>ssa</i> )<br>Φ472.1 (none)              |
| BSAC_bs1388 | CP061132      | 1,932,413 bp | Φ10750.1 ( <i>speC/spd1</i> )<br>Φ10750.2 ( <i>spd3</i> )<br>Φ10750.3 ( <i>ssa</i> )<br>Φ1388.1 (none)       |
| BSAC_bs1802 | CP061131      | 1,909,430 bp | Φ1802.1 ( <i>speC/spd1</i> )<br>Φ427.2 ( <i>spd3</i> )<br>Φ10750.3 ( <i>ssa</i> )<br>Φ1802.2 ( <i>sdn</i> )  |

**Supplementary Table 3.** Primers used in the study

| <b>Primer</b> | <b>Sequence (5'-3')</b>  | <b>Function</b>           |
|---------------|--------------------------|---------------------------|
| 10750.1 A     | GCATCCAGACTATTCCATTC     | Φ10750.1/Φ427.1 induction |
| 10750.1 B     | CGTATGATGTTCAATCTAGGATAG |                           |
| 10750.1 C     | TGCGTCAACAGTTATTGTCG     |                           |
| 10750.1 D     | ACATTAGCCTCGTTCACGC      |                           |
| 10750.2 A     | ATCAACTAAGGCAGCTTCTG     | Φ10750.2/Φ427.1 induction |
| 10750.2 B     | CGGAACTCTTGACTACACCTC    |                           |
| 10750.2 C     | AACAAACCTTGCCAAGTACG     |                           |
| 10750.2 D     | CCATCTCTGTAACAGTCAAATG   |                           |
| 10750.3 A     | CCAATCAAGAAGGCTGTAATG    | Φ10750.3/Φ427.1 induction |
| 10750.3 B     | GCACCTGGAGCAATATTTG      |                           |
| 10750.3 C     | TACAGAAGGATATCGTAACGGG   |                           |
| 10750.3 D     | TTGCAAGTCGTCTCATTCAAG    |                           |
| SpyCIM4 A     | CGAGAACTTCCGGTAATTC      | SpyCIM4 induction         |
| SpyCIM4 B     | CGAATATCAGCATGACTTTG     |                           |
| SpyCIM4 C     | AGCATCCAAGACCAATGG       |                           |
| SpyCIM4 D     | CTTCAAGCAATGACAACCC      |                           |
| MutL_F        | GTCTCAATTTCCCCACCAGTAG   | <i>mutL</i> transcription |
| MutL_R        | CAAATTGCAGCTGGTGAAG      |                           |
| MutS_F        | CTTGAAGCGGGGTCATATTC     | <i>mutS</i> transcription |
| MutS_R        | GTTGGTGCTAAGACCATATTTGC  |                           |

## Supplementary Figures

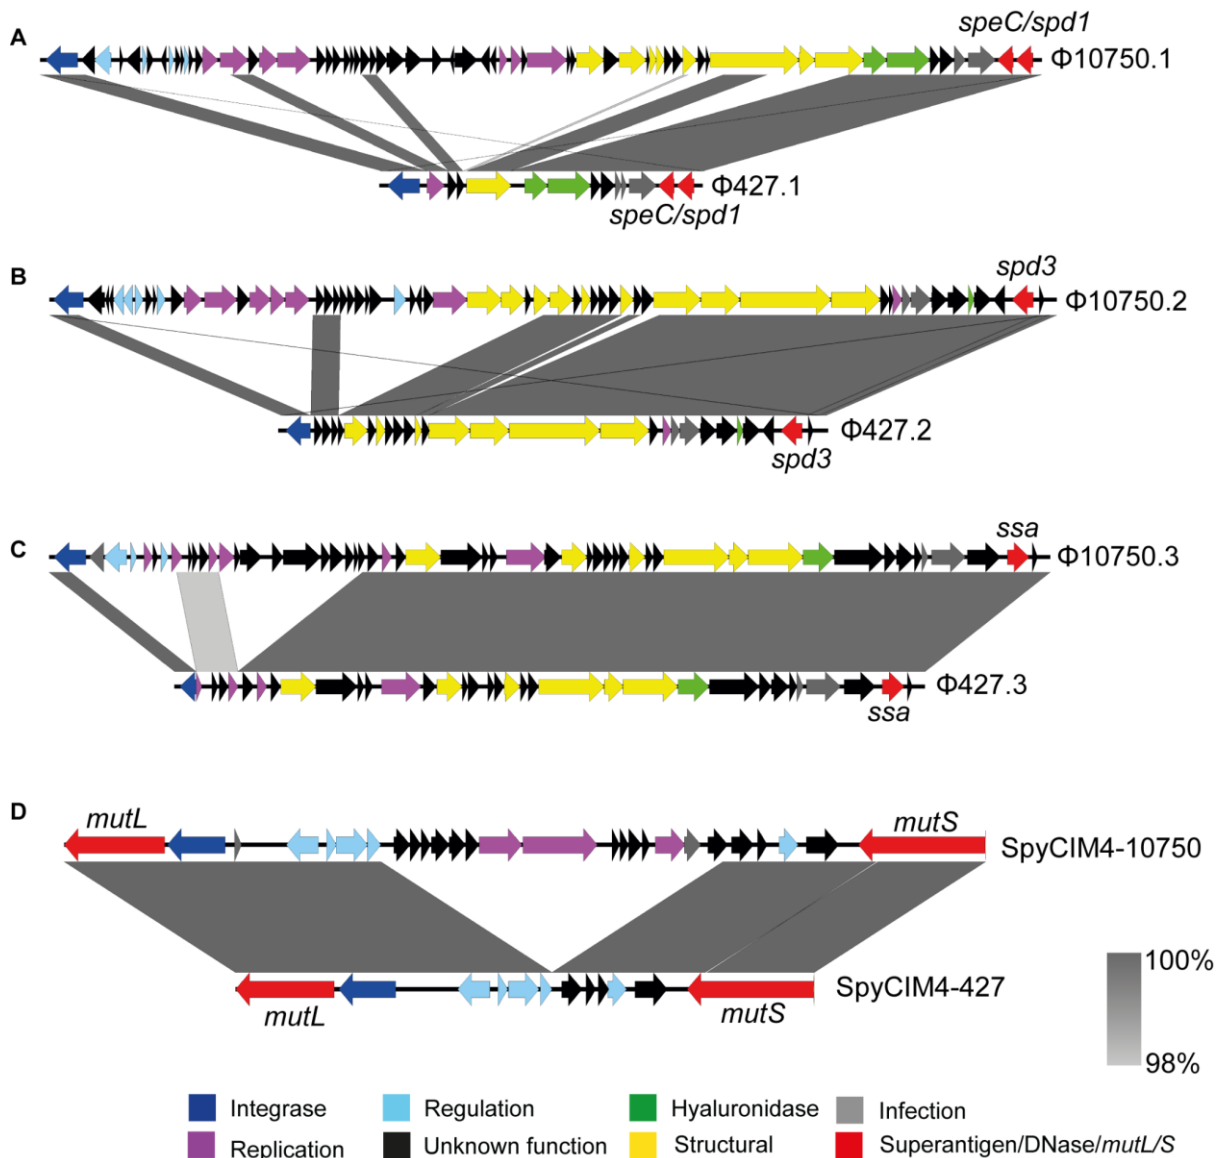

**Supplementary Figure 1. Gene loss within the prophage and SpyCI regions of MEW427 compared to MGAS10750.** The regions of each MGAS10750 prophage and SpyCI element were extracted from the genome and compared to corresponding regions in MEW427 genome using EasyFig (Sullivan et al. 2011). All three prophages (A-C) and the SpyCI (D) of MEW427 were much shorter than in MGAS10750, relating to loss of sequence and consequently loss of genes. Colours represent predicted gene function according to the key. Grey shade indicates sequence identity determined by BLAST.

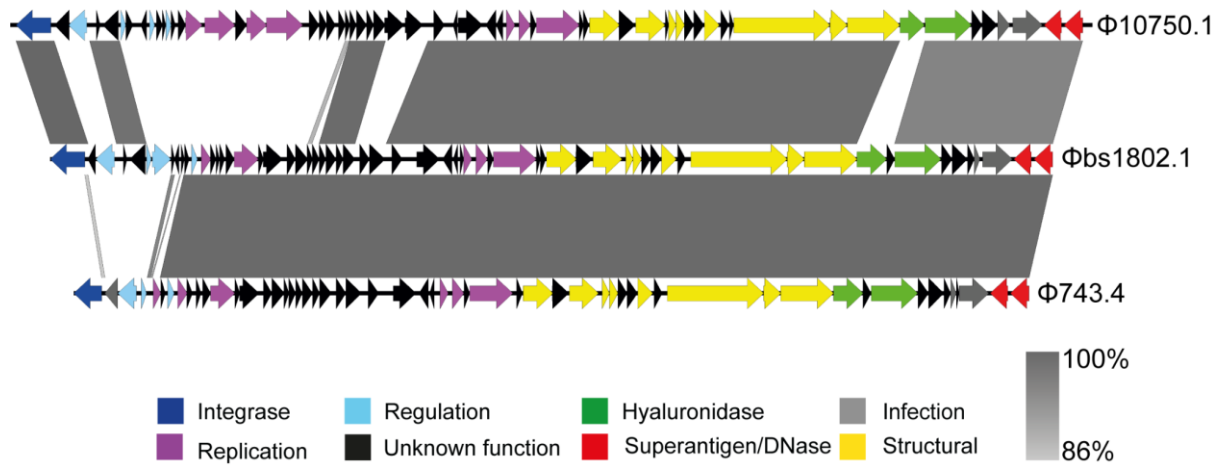

**Supplementary Figure 2. Comparison of *speC/spd1* associated prophages.** The prophage in BSAC\_bs1802 associated with *speC/spd1* ( $\Phi$ 1802.1) showed some homology to  $\Phi$ 10750.1 but varied at the integrase end.  $\Phi$ bs1802.1 was more closely related to  $\Phi$ 743.4 found in *emm87* isolate NGAS743 (gene loci: DI45\_06730-DI45\_07035, Genbank accession: CP007560.1) (Athey *et al.* 2016) although still differed at the integrase end. Colours represent predicted gene function according to the key. Grey shade indicates sequence identity determined by BLAST. Figure constructed using EasyFig (Sullivan *et al.* 2011).

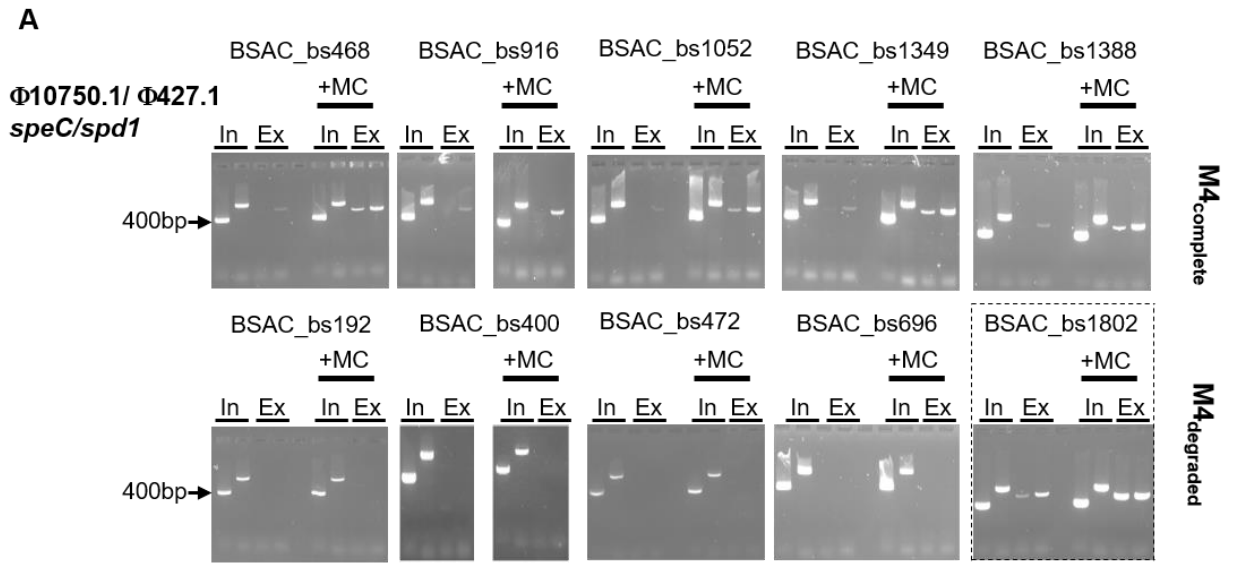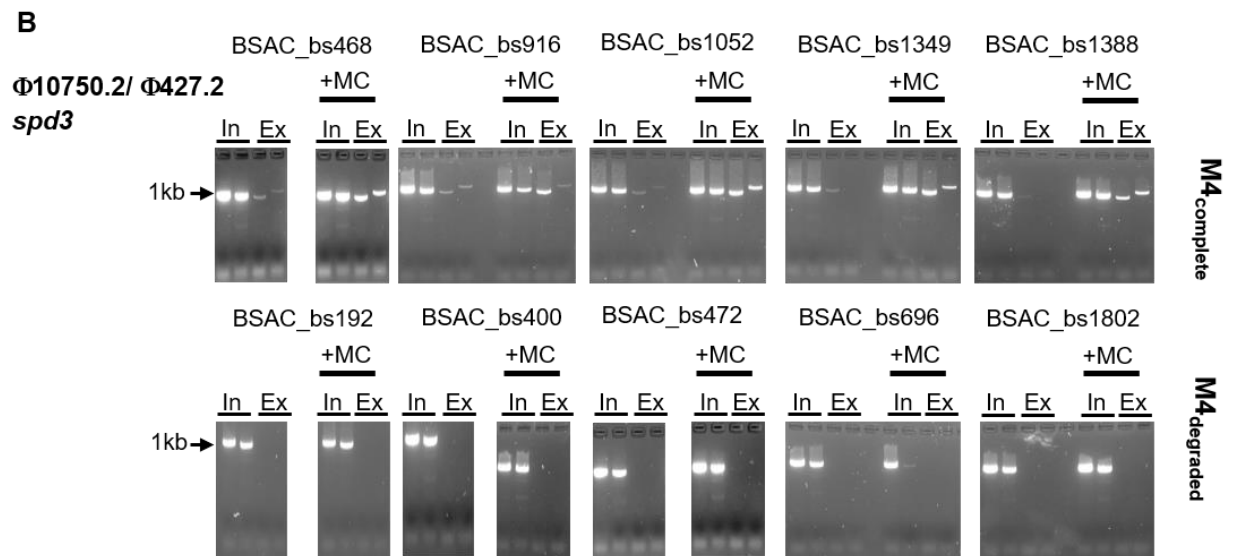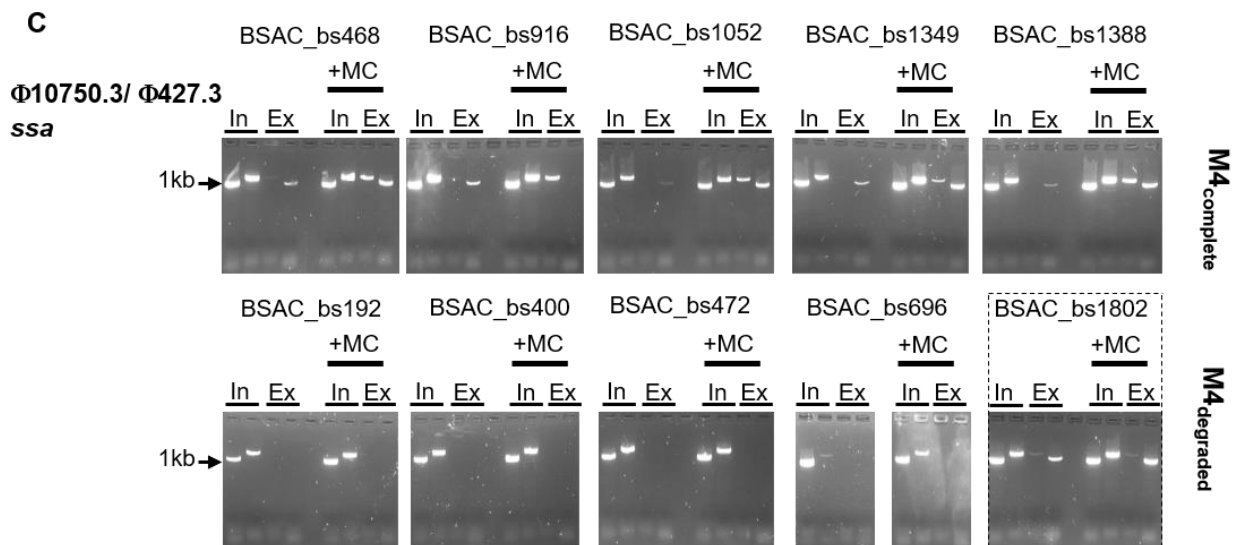

**Supplementary Figure 3. Phage induction in M4<sub>complete</sub> isolates but not M4<sub>degraded</sub> isolates.**

Both integrated prophage, as indicated by bands in the two 'In' lanes, and excised prophage, as indicated by bands in the two 'Ex' lanes (primer pairs A+D and C+B) were detected in all five M4<sub>complete</sub> isolates and for all three prophages; (A)  $\Phi$ 10750.1/ $\Phi$ 427.1, (B)  $\Phi$ 10750.2/ $\Phi$ 427.2, (C)  $\Phi$ 10750.3/ $\Phi$ 427.3. Excision was enhanced by the addition of mitomycin C (+MC). No excision was detected for all three prophages in all of the four M4<sub>degraded</sub> isolates, as indicated by bands only in the 'In' lanes but not the 'Ex' lanes, even with mitomycin C. BSAC\_bs1802 groups with M4<sub>degraded</sub> but carried a different full-length *speC/spdI* prophage, which was inducible and is highlighted with a dotted box (A). The  $\Phi$ 10750.3/ $\Phi$ 427.3 *ssa* prophage is also inducible in this isolate compared to the other M4<sub>degraded</sub> isolates (dotted box, C). Isolates for which PCR products from with and without MC were not run in parallel on the same agarose gel are presented as separate but contiguous panels. Arrows represent molecular weight.

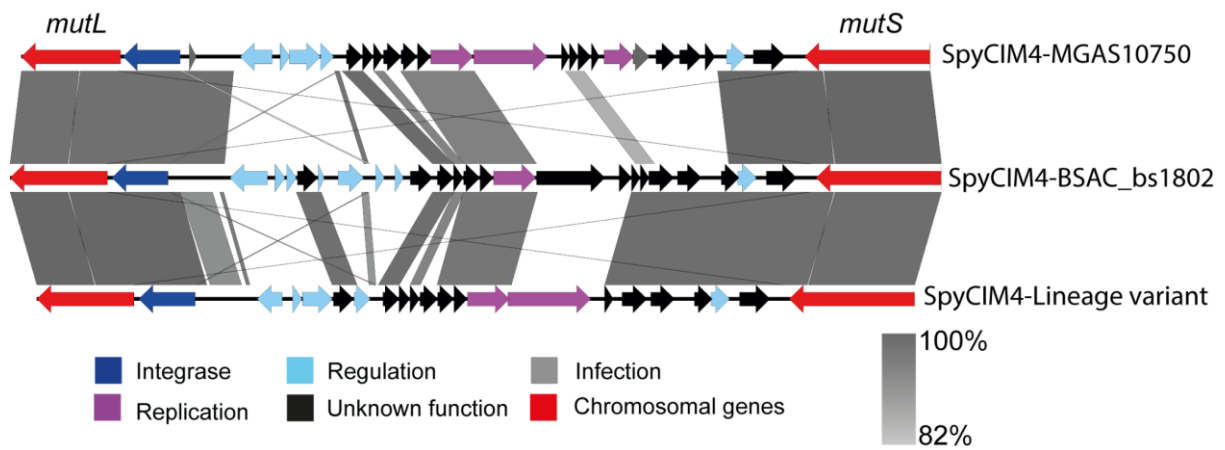

**Supplementary Figure 4. SpyCIM4 elements identified within the population.** Apart from the SpyCIM4-MGAS10750 and the degraded SpyCIM4-MEW427, two other variants of SpyCIM4 were identified in the population. One was unique to BSAC\_bs1802 (SpyCIM4-BSAC\_bs1802) and the other was found in the small 13 isolate lineage (indicated by a dotted line in Figure 5) (SpyCIM4-Lineage variant). Colours represent predicted gene function according to the key. Grey shade indicates sequence identity determined by BLAST. Figure constructed using EasyFig (Sullivan et al. 2011).

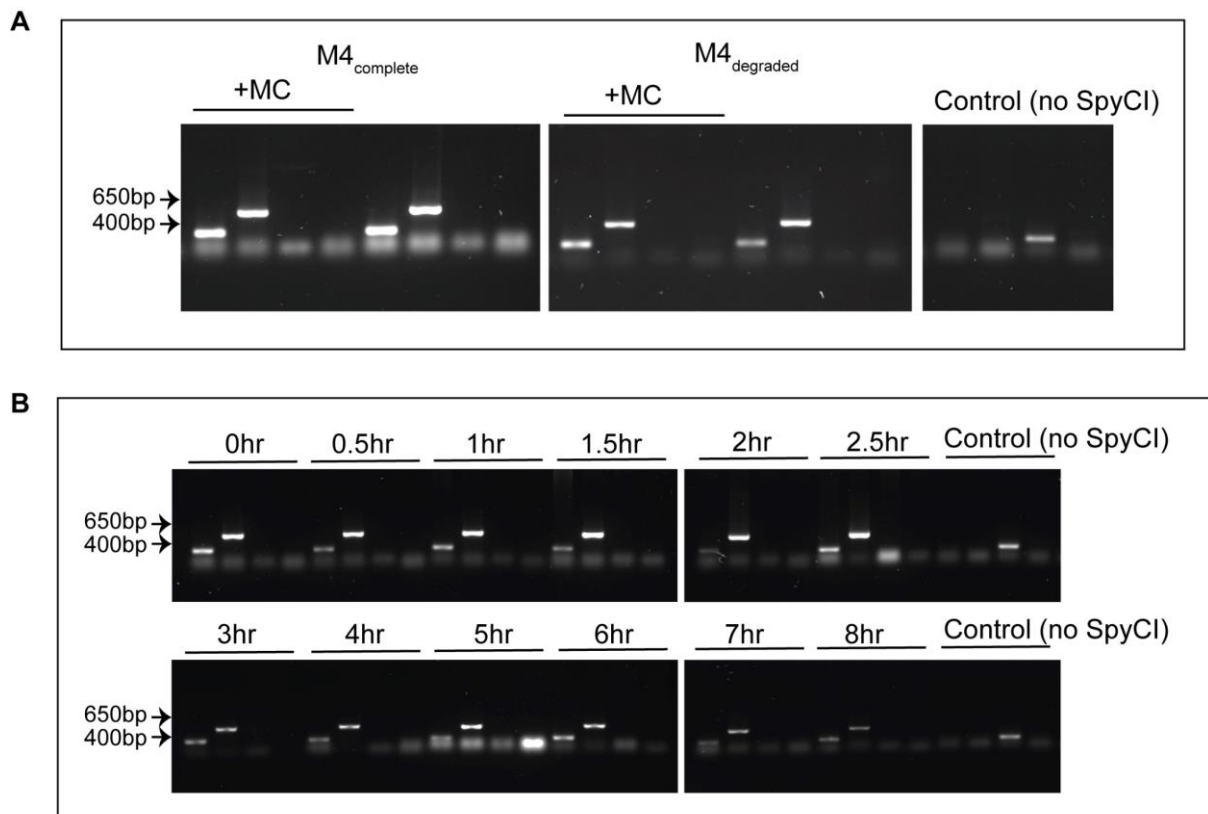

**Supplementary Figure 5. SpyCIM4 is not induced in any of the *emm4* BSAC isolates. (A)** Primers were designed to detect integrated and excised SpyCI in genotype *emm4* isolates in response to induction with mitomycin C. Only integrated SpyCI was detected (bands in first two lanes per sample) in both M4<sub>complete</sub> and M4<sub>degraded</sub> isolates, and no evidence of excised SpyCI (third and fourth lanes per sample), even in the presence of mitomycin C (+MC). **(B)** To determine if the *emm4* SpyCI would excise at specific stages during liquid growth of an M4<sub>complete</sub> isolate, samples were taken at 30-minute intervals from 0-3 hours, then at 60-minute intervals thereafter, for a further 5 hours. Excised SpyCI was not detected at any point. A control DNA sample was also used in each experiment extracted from *emm89* isolate H293; this isolate has no SpyCI element and therefore only a band in third lane can be detected. Arrows indicate size (base pairs) positions from the marker.



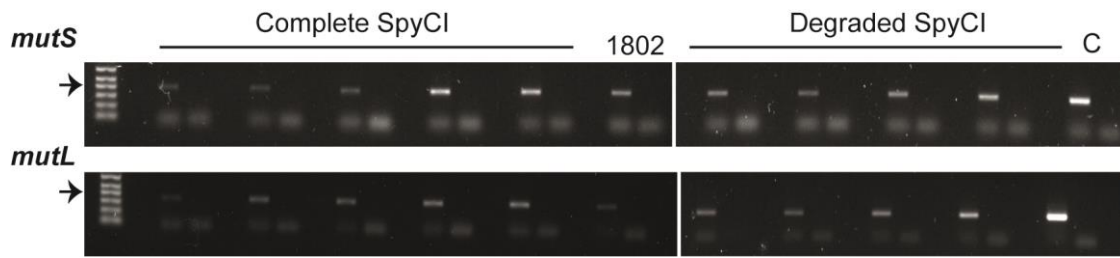

**Supplementary Figure 6. Expression of both *mutL* and *mutS* detected in both M4<sub>complete</sub>- and M4<sub>degraded</sub> type *emm4* isolates.** Bacterial RNA was extracted from M4<sub>complete</sub>- and M4<sub>degraded</sub> isolates at 3 hours of growth (early log) and converted to cDNA by reverse transcription (RT). 100ng of cDNA was used to detect *mutL* or *mutS* transcript by PCR. Each isolate is represented by two lanes; the first is the RT positive sample (i.e. containing cDNA), the second is a negative control whereby RT was excluded. Transcription of *mutS* (top gel) and *mutL* (bottom gel) was detected in all five BSAC M4<sub>complete</sub> as well as all four BSAC M4<sub>degraded</sub> isolates. Transcripts for *mutS* and *mutL* were also detected in BSAC\_bs1802 which carries a different SpyCI element to the other *emm4* isolates. C; DNA from control SpyCI-negative H293 in the first lane, no-DNA sample in the second lane. Arrows indicate 400bp on the 1kb Plus Ladder (Invitrogen).

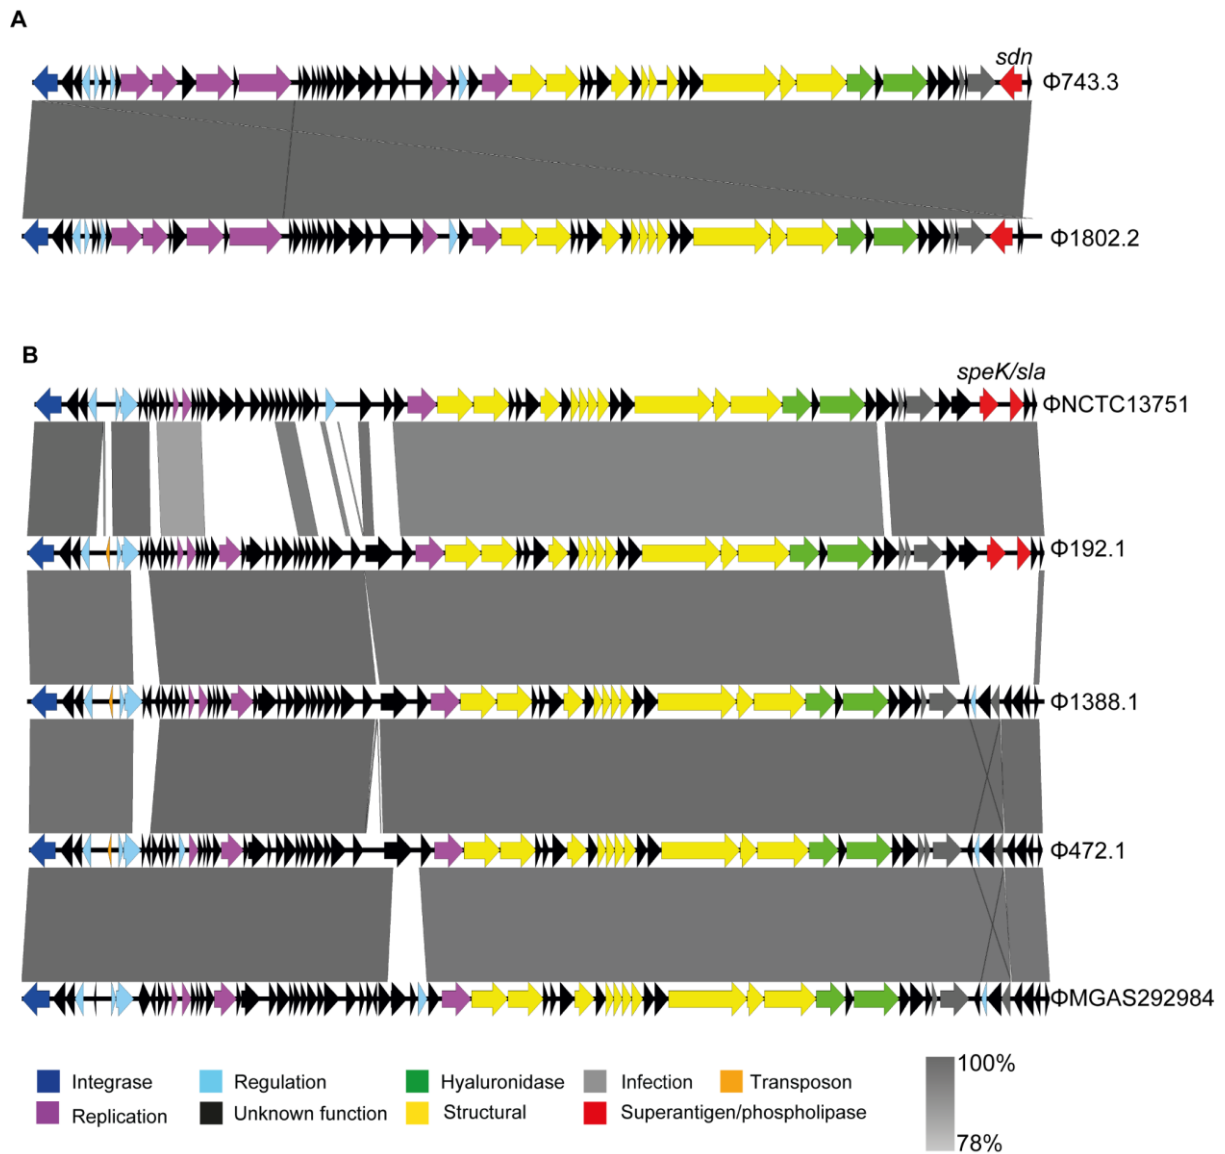

**Supplementary Figure 7. Comparison of additional prophages found in the BSAC isolate genomes. (A)** An additional prophage was found in BSAC\_bs1802 (Φ1802.2) associated with the DNase *sdn*. This phage was almost identical to Φ743.3 found in *emm87* isolate NGAS743 (gene loci: DI45\_06355-DI45\_06665, Genbank accession: CP007560.1 (Athey *et al.* 2016) and was found to be integrated in an equivalent position. **(B)** BSAC\_bs192 was found to carry a prophage associated with the superantigen *speK* and the phospholipase *sla* (Φ192.1). This prophage shared closest homology with a prophage in the genome of NCTC13751 (gene loci: NCTC13751\_1363-NCTC13751\_1427, Genbank accession: LS483437.1). However, there was also a high level of homology between Φ192.1 and phages Φ1388.1 and Φ472.1 found in

BSAC\_bs1388 and BSAC\_bs472, respectively.  $\Phi$ 1388.1 and  $\Phi$ 472.1 did not carry *speK/sla* or any known virulence factors, and  $\Phi$ 1388.1 was integrated into a different site to  $\Phi$ 192.1 and  $\Phi$ 472.1, that shared integration sites. A prophage within the genome of isolate MGAS29284 (gene loci: DZ066\_3390-DZ066\_3790, Genbank accession: CP031619), which does not carry *speK/sla* or any known virulence factors, shared the closest homology with  $\Phi$ 192.1,  $\Phi$ 1388.1 and  $\Phi$ 472.1 and integrated in an equivalent position to  $\Phi$ 192.1/ $\Phi$ 472.1. Colours represent predicted gene function according to the key. Grey shade indicates sequence identity determined by BLAST. Figure constructed using EasyFig (Sullivan et al. 2011).

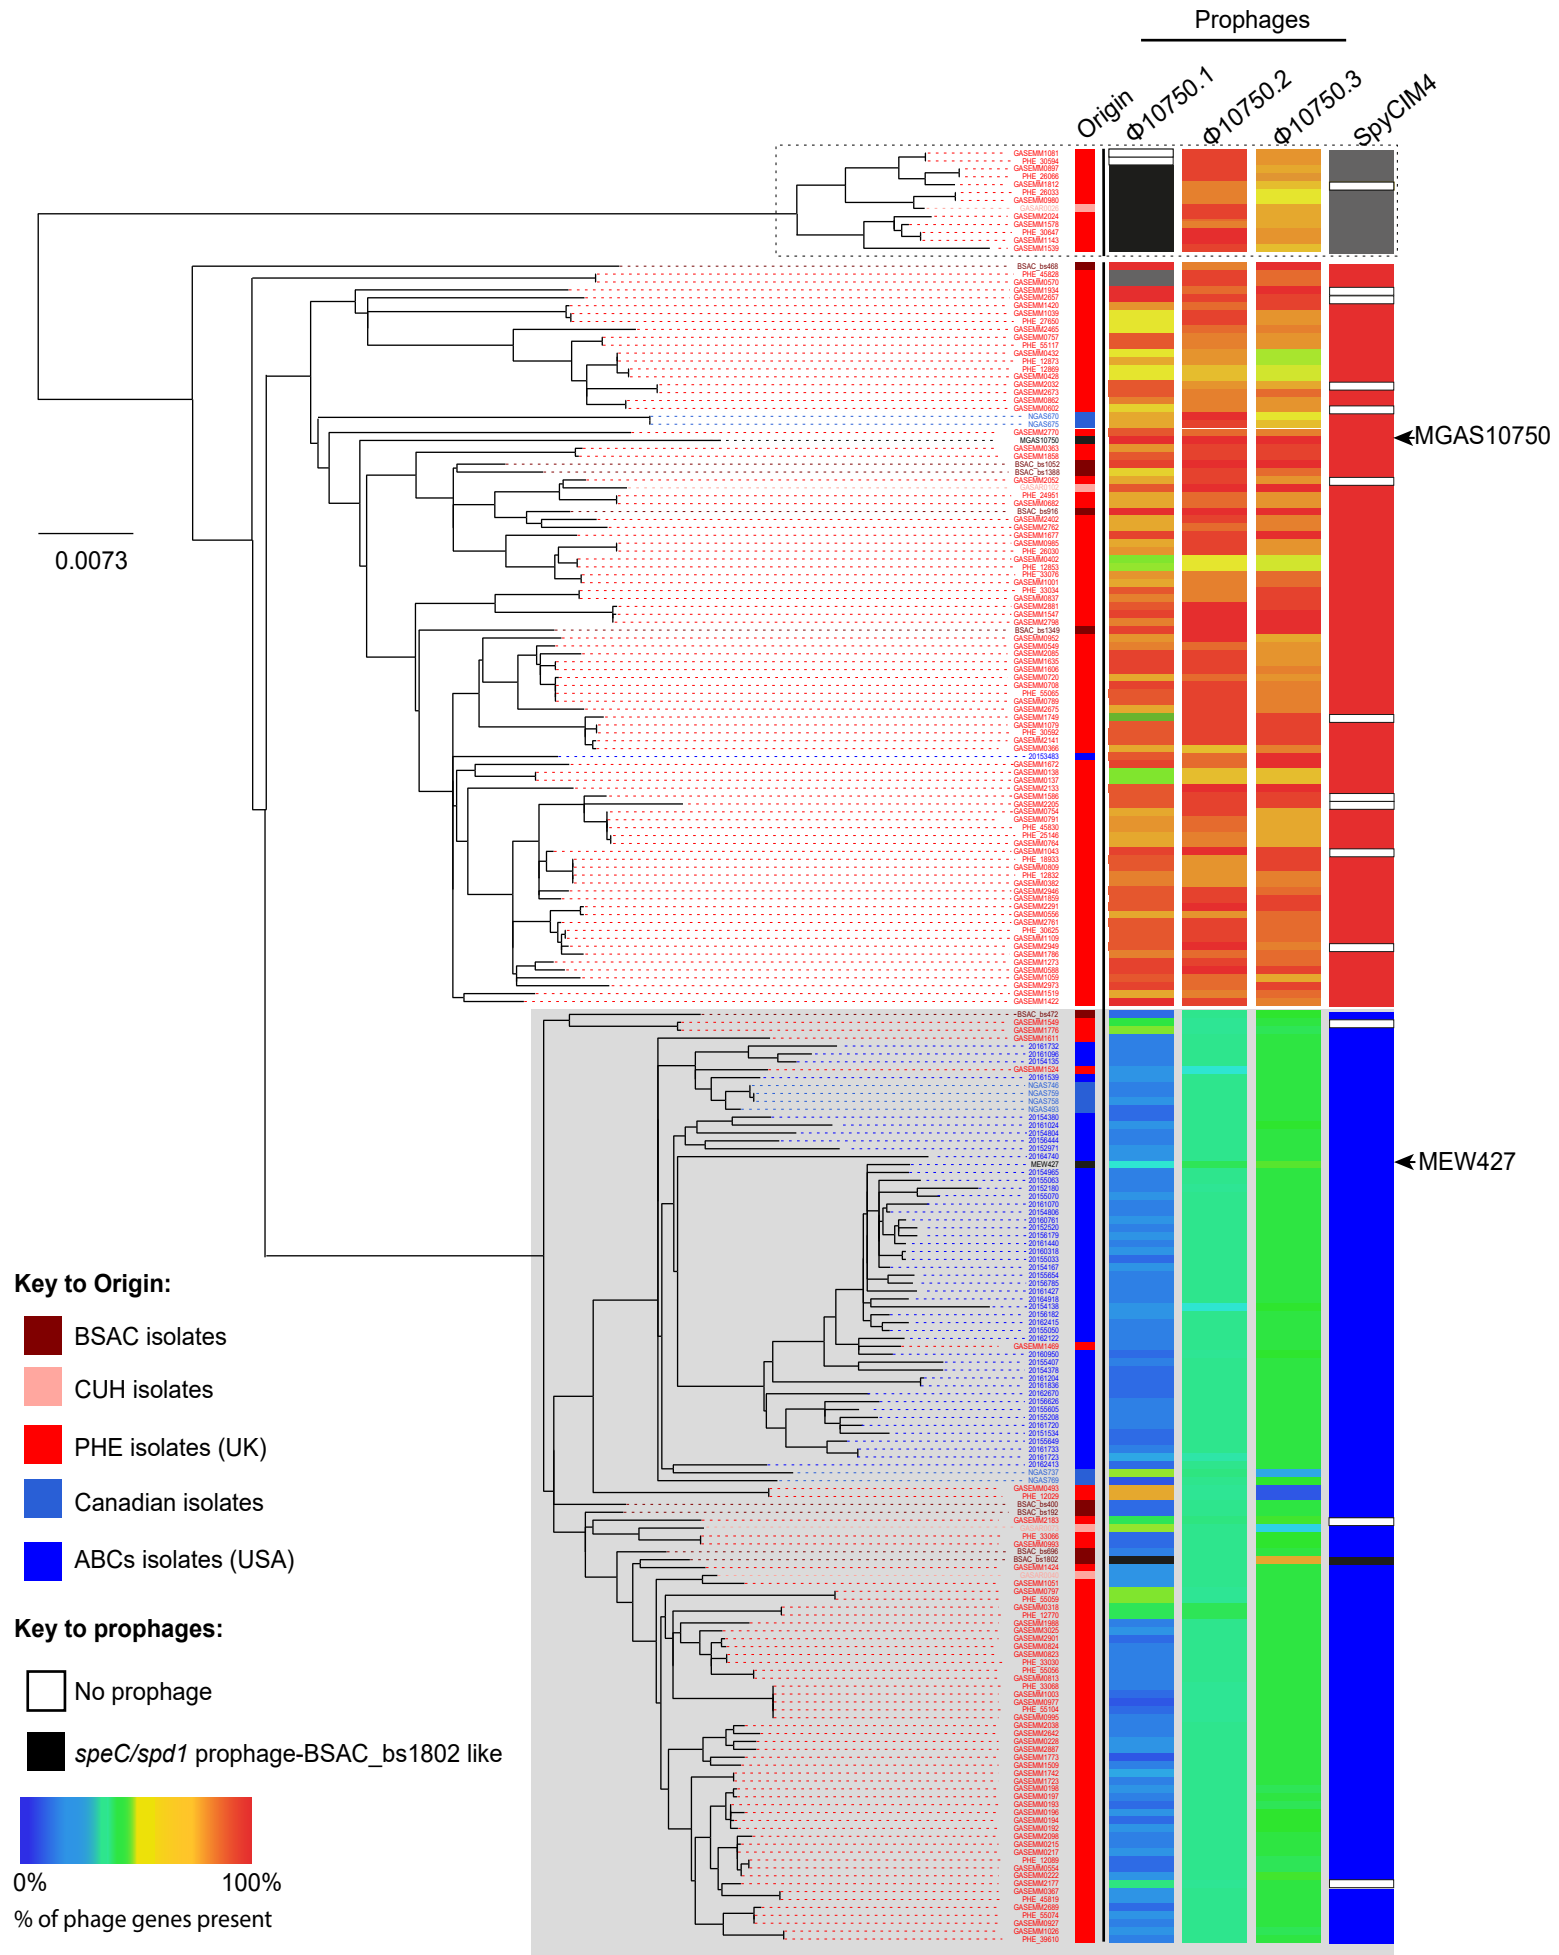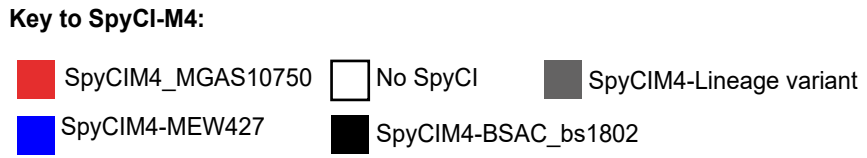

**Supplementary Figure 8. Lineages broadly associated with levels of prophage gene presence.** Mid-rooted phylogenetic tree constructed from core SNPs obtained after mapping short-read sequence data from 223 isolates as well as the reference genome MEW427 to MGAS10750 (as Figure 5). Lineages are defined as in Figure 5; MGAS10750-like (no shading), MEW427-like (grey shaded), separate 13 isolate lineage (dotted-line). The percentage (%) of genes present in the *de novo* assembled genome for each isolate was calculated by BLAST analysis for each of the three MGAS10750 prophages ( $\Phi$ 10750.1-3) and indicated by colour scale (key indicated). Two isolates within the MGAS10750 lineage did not have the  $\Phi$ 10750.1 prophage as indicated by a white box in the first prophage column. The identification of SpyCIM4 regions was determined by sequence alignment and the majority were found to have either SpyCIM4 as MGAS10750 (red) or as MEW427 (blue). BSAC\_bs1802 had a unique SpyCIM4 (black) and the isolates belonging to the lineage highlighted by a dotted line had a fourth type of SpyCIM4 (Lineage variant, grey) (see Supplementary Figure 3). Isolates names are given for each branch and colour coded as in the first column (Origin) based on collection; BSAC isolates (n=10), CUH (Cambridgeshire n=4 (Turner *et al.* 2017)), PHE (UK, n=153 (Chalker *et al.* 2017; Kapatai *et al.*, 2017)), Canadian (n=8 (Athey *et al.* 2014, Athey *et al.* 2016)), ABCs (USA, n=48 (Chochua *et al.*, 2017)). Scale bar represents substitutions per site.
